# Supplementary material
Source: PubMed Central journal article supplement (PMC8617410)
Supplement: pnas.2115292118.sapp.pdf [file pnas.2115292118.sapp.pdf]

**Supplementary Information for**

**Multi-substrate DNA stable isotope probing reveals guild structure of bacteria that mediate soil carbon cycling**

Samuel E. Barnett, Nicholas D. Youngblut Chantal N. Koechli, and Daniel H. Buckley  
Email: [dbuckley@cornell.edu](mailto:dbuckley@cornell.edu)

This PDF file includes:

Supplementary Materials and Methods  
Tables S1 to S2  
Figures S1 to S9  
SI References

Other supplementary materials for this manuscript include the following:

Supplementary Dataset 1  
Supplementary Dataset 2

## Supplemental Materials and Methods

### *Soil microcosm experiments*

Soils were collected from an organic farm in Penn Yan, New York, USA. Detailed description of the field site can be found in Berthrong *et al.* 2013 (1) and Pepe-Ranney *et al.* 2016 (2). Soil used to make microcosms for the preliminary substrate mineralization experiment were collected on August 26<sup>th</sup>, 2014, while soil used for the DNA-SIP microcosms were collected on October 27<sup>th</sup>, 2014. The field consisted of 6 strips with an alternating crop rotation scheme. At each strip, 15 soil cores (5 cm deep) were collected spaced about 1 m apart along a North-South transect. Soil cores were sieved to 2 mm, homogenized together, then stored at 4°C overnight. An aliquot for bulk soil bacterial community sequencing was stored at -80°C. Soil moisture was measured gravimetrically (2).

Soil incubations with <sup>13</sup>C-labeled and unlabeled substrates were performed as previously described (2) except that C amendment consisted of nine substrates: cellulose, xylose, glucose, glycerol, vanillin, palmitic acid, amino acid, lactate, and oxalate. These nine substrates were chosen as they vary in their bioavailability initially determined by solubility and hydrophobicity. Hydrophobicity was defined by the octanol-water partition coefficients predicted using the XLogP3 model (3) and reported in PubChem. It is impossible to determine logP for cellulose, since it is insoluble. We therefore removed cellulose from the comparison of C mineralization dynamics and bioavailability (Fig. S3). As the amino acids were added as a homogenous mixture, we used an average of the predicted LogP of all 20 common amino acids.

Isotopically labeled substrates were acquired from various sources (Table S2) but were all >99% <sup>13</sup>C-labeled. In order to maintain consistent metabolic dynamics between treatments, all substrates were added to each microcosm, but each treatment different in which particular substrate was <sup>13</sup>C-labeled with the other 8 unlabeled (Fig. 1). A set of <sup>12</sup>C-control microcosms, consisting of all substrates added but unlabeled, were created for each sampling day. Additionally, a set of H<sub>2</sub>O-control microcosms were created which did not receive any substrates. Microcosms consisted of 15 g dry weight soil in a 250 mL sterile glass Erlenmeyer flask sealed with a sterile rubber stopper. To each microcosm (except H<sub>2</sub>O-controls), each substrate was added such that 0.4 mg of C was added per g dry weight of soil. This mass of carbon has been shown to be sufficient for sensitivity of HR-SIP methodologies (2). Cellulose and palmitic acid, which are insoluble in water, were autoclaved sterilized and then evenly dispersed across the soil surface after passing through a 250 μm sieve. All other substrates were dissolved in a 2.9% Murashige Skoog basal salt mixture (Sigma Aldrich M5524) at a volume to bring water moisture to 50% then evenly spread over soil surface with a sterile Mucosal Atomization Device (Mountainside Medical Equipment, Marcy, NY, USA). Three replicate microcosms were created for each sampling day. Microcosms were stored at room temperature in the dark until sampling. Microcosms were sampled at multiple timepoints based on their carbon mineralization dynamics in the preliminary study (Fig. S2). <sup>13</sup>C-glucose, <sup>13</sup>C-xylose, <sup>13</sup>C-amino acids, and <sup>13</sup>C-glycerol microcosms were sampled 1, 3, 6 and 14 days after substrate addition. <sup>13</sup>C-lactate microcosms were sampled on days 1, 3, and 6. <sup>13</sup>C-oxalate was sampled on days 3, 6, and 14. <sup>13</sup>C-vanillin microcosms were sampled on days 6, 14, 30 and 48. <sup>13</sup>C-cellulose microcosms were sampled on days 3, 6, 14, 30, and 48. <sup>13</sup>C-palmitic acid microcosms were sampled on days 6, 14, 30, and 48. <sup>12</sup>C-control microcosms were sampled on all days and H<sub>2</sub>O-control microcosms sampled on day 48. Sampling was destructive, so separate microcosms were created for each sampling. Soils were removed from the microcosms using a sterile spatula and

stored immediately at  $-80^{\circ}\text{C}$ . Whenever possible, microcosms were stored and handled in a randomized order so as to minimize batch effects. Microcosm headspace was collected repeatedly throughout the experiment from the set of replicate microcosms from each treatment to be sampled last. 250  $\mu\text{l}$  of headspace was collected and run on a GCMS-QP2010S (Shimadzu, Kyoto, Japan) containing a Carboxen 1010 PLOT column (Supelco, Bellefonte, PA, USA) with helium as the carrier gas. All microcosms headspaces were then flushed with air through a 0.22  $\mu\text{m}$  filter to limit oxygen depletion.

#### *DNA extraction and isopycnic centrifugation*

DNA extraction and isopycnic centrifugation was conducted as previously described (2). DNA was extracted from 0.25 g of frozen soil using a modified Griffiths protocol (4). DNA was quantified with a Quant-iT PicoGreen dsDNA Assay Kit (Thermo Fisher Scientific, Waltham, MA, USA). Replicate DNA extractions were performed for each treatment in order to get over 5  $\mu\text{g}$  of DNA (usually about 5 replicate extractions). An aliquot of DNA extract was used directly for whole bacterial community sequencing (later referred to as “unfractionated”) but was first purified with illustra MicroSpin G-50 Columns.

Prior to isopycnic centrifugation, DNA was size-selected ( $\geq 4$  kb) with a BluePippin with 0.75% agarose, dye free, low range cassettes (Sage Science, Beverly, MA, USA). Size selection was done in order to reduce the centrifugation time required for all DNA fragments to reach sedimentation equilibrium (5). Density gradients consisted of 5  $\mu\text{g}$  size-selected DNA in 1X TE buffer, 430  $\mu\text{l}$  gradient solution (1.69  $\text{g ml}^{-1}$  CsCl, 15 mM Tris-HCL (pH 8.0), 15 mM KCl, and 15 mM EDTA) with enough extra 1X TE buffer to bring total volume to 450  $\mu\text{l}$ . Gradients were generated in 4.7 ml OptiSeal ultracentrifuge tubes (#361621, Beckman Coulter, Brea, CA, USA). Ultracentrifugation was conducted at 55000 RPM at  $20^{\circ}\text{C}$  for  $\geq 66$  hr in a TLA-110 rotor with an Optima MAX-E ultracentrifuge (Beckman Coulter, Brea, CA, USA). Gradient fractions of  $\sim 100$   $\mu\text{l}$  were collected by pumping water into the top of the gradient with displaced fractions collected from a pierced hole in the tube bottom. Fractions were desalted with the Agencourt Ampure XP system (Beckman Coulter, Brea, CA, USA).

#### *16S rRNA gene amplification and sequencing*

We amplified the V4 region of the 16S rRNA gene as previously described (6) using dual indexed primers (515f and 806r) developed by Kozich *et al.* (7). Polymerase chain reaction (PCR) amplification was performed in 25  $\mu\text{l}$  triplicate reactions with 2  $\mu\text{l}$  template (0-5 ng DNA), 13.1  $\mu\text{l}$  Q5 hot start high fidelity master mix (New England Biolabs, Ipswich, MA, USA) mixed 1:0.025 v/v with 4X Quant-iT PicoGreen reagent (Thermo Fisher Scientific, Waltham, MA, USA), 2.5  $\mu\text{l}$  mixed 10X primers, and 7.4  $\mu\text{l}$  PCR grade water. PCR conditions were  $95^{\circ}\text{C}$  for 2 min, followed by 30 cycles of  $95^{\circ}\text{C}$  for 20 sec,  $55^{\circ}\text{C}$  for 15 sec, and  $72^{\circ}\text{C}$  for 10 sec, and followed by  $72^{\circ}\text{C}$  for 5 min. Triplicate successful PCR reactions were pooled and normalized with the Invitrogen SequelPrep Normalization Plate Kit (Thermo Fisher Scientific, Waltham, MA, USA). Pooled amplicon libraries (up to 192 samples each) were gel-purified with the Wizard SV Gel and PCR Clean-up System (Promega, Madison, WI, USA) and sequenced on the Illumina MiSeq platform with paired end 2x250 bp V2 kit at the Cornell Biotechnology Resource Center (Ithaca, NY, USA). Nine libraries were sequenced in total. Raw sequencing reads can be accessed at the NCBI Short Read Archive (accession PRJNA668741).

Separately for each sequencing library, forward and reverse sequences were merged using PEAR (8) and demultiplexed using a custom script. Reads were filtered using alignment

based quality filtering (SILVA SEED database, maximum homopolymer length 8, and maximum expected error 1) with mothur (9). Reads classified as mitochondria, chloroplasts, or *Archaea* were removed. At this point all libraries were combined. OTUs were clustered to 97% sequence identity and chimeras were removed using USEARCH (10). OTU taxonomy was assigned based on SILVA release 111 with the uclust algorithm through QIIME (11).

#### *Guild C assimilation and growth characteristics*

Four guild C assimilation and growth characteristics were calculated. All characteristics were first calculated for individual OTUs then averaged across OTUs within each guild. The number of C sources from which C was assimilated was simply the number of C sources from which an OTU was  $^{13}\text{C}$ -labeled at any timepoint. Since logP is not available for cellulose, C source bioavailability was defined operationally based on the day of maximal  $^{13}\text{C}$  mineralization rate for each substrate. This value was calculated as 48 (length of the experiment in days) minus the day of maximal  $^{13}\text{C}$  mineralization rate for each substrate. Thus, earlier mineralized C sources had higher bioavailability. For each OTU, bioavailability was averaged across all sources from which  $^{13}\text{C}$  was assimilated. Latency of C assimilation was calculated by taking the natural log of the ratio between the first day of  $^{13}\text{C}$ -labelling and the day of peak C mineralization for each C source for each OTU. This value was then averaged across all sources from which C was assimilated. The maximum  $\log_2$  fold change in OTU abundance in the unfractionated DNA was calculated following abundance normalization to minimize bias due to compositional data. Normalization included two steps: normalizing for predicted *rrn* copy number and normalizing by sample DNA yield. OTU relative abundances were first divided by their predicted rRNA operon copy number, then by the estimate copy number for the entire community. Within each timepoint, normalized relative abundances were then multiplied by the average DNA yield across the replicate microcosms to obtain normalized abundance. The extracted DNA yield ( $\text{ng DNA g}^{-1}$  dry weight soil) was quantified with the Quant-iT PicoGreen dsDNA Assay Kit (Thermo Fisher Scientific, Waltham, MA, USA). Untreated bulk soils were used as our baseline abundance, with OTUs undetected in these soils assigned the lowest abundance measured. For each OTU, the  $\log_2$  fold change in abundance between this baseline and the timepoint when abundance was highest was then calculated. If abundance at all timepoints was less than the baseline or undetected, the maximum abundance was assigned the baseline abundance, making the  $\log_2$  fold change = 0 for such OTUs. If an OTU is  $^{13}\text{C}$ -labeled, it is growing on the substrates provided. A decrease in abundance at a time when taxa are labeled indicates either that the rate of mortality for the population exceeds the division rate (deaths > births), that labelling occurred prior to growth decline, or that normalization was not entirely successful at eliminating all variance due to compositional sequencing.

#### *Mapping incorporators to independent datasets to assess biogeography*

OTU count tables, representative 16S rRNA gene sequences, and metadata for studies 619 (continental dataset) and 928 (global dataset) were downloaded from QIITA (<https://qiita.ucsd.edu/>). Incorporator OTUs were mapped to these datasets with the mothur alignment tool (9) using the Silva reference alignment as a template. OTUs mapped at 97% sequence identity were retained. For simplicity, guilds were grouped based on the form of the substrates from which they assimilated C (D = dissolved, including glucose, xylose, amino acids, glycerol, oxalate, and lactate; V = vanillin; and P = particulate, including cellulose and palmitic acid) and time of C assimilation (E = early, first half of timepoints; L = late, second half of

timepoints). For each dataset, guilds designations (R) of mapped OTUs were used in combination with their OTU count tables (L) and sample metadata (Q) for RLQ and fourth corner analyses (12, 13). For the RLQ analysis, the correspondence analysis was applied to the L table, and a PCA was applied to the R and Q tables. The environmental variables in the PCA of the Q table were weighted by site coefficients from the correspondence analysis of the L table. Monte-Carlo permutations ( $n = 9999$ ) were used to test for a trait-environment relationship, with the neutral model set as type 6 (12). The type 6 null model was also used for the fourth corner analysis ( $n = 9999$ ) and the Benjamini-Hochberg correction for multiple hypotheses was applied. Both RLQ and fourth corner analyses were conducted with the *ade4* R package (14). In order to reduce the number of multiple hypotheses in the fourth corner analysis, only guilds with an absolute cumulative loading  $> 0.4$  for principal components 1 and 2 were included in both fourth corner and RLQ analyses. Testing for significant bivariate relationships between guilds and environmental parameters with the fourth corner analysis was not fruitful due to the high number of multiple hypotheses and possibly because the associations were not bivariate.

## Supplemental Tables and Figures

**Table S1:** p-values for global significance permutation tests of RLQ associations. Model 2 tests for a link between traits and abundances (assuming an association between abundance and environmental variables). Model 4 tests for a link between abundances and environmental variables (assuming an association between traits and abundance). Significance for both tests indicates that traits, abundances, and environmental parameters are associated. For each test, 9999 permutation replicates were conducted.

| Survey scale | QIITA study ID | pvalue  |         |
|--------------|----------------|---------|---------|
|              |                | Model 2 | Model 4 |
| Continental  | 619            | 7e-4    | 1e-4    |
| Global       | 928            | 1e-4    | 7e-4    |

**Table S2:** Isotopically labeled substrates used in the DNA-SIP experiment.

| Substrate                | Isotopic labeling                  | <sup>13</sup> C enrichment | Manufacturer       | Manufacturer Location |
|--------------------------|------------------------------------|----------------------------|--------------------|-----------------------|
| cellulose                | *                                  | *                          | *                  | *                     |
| D-xylose                 | <sup>13</sup> C <sub>5</sub>       | 99%                        | Omicron            | South Bend, IN, USA   |
| D-glucose                | <sup>13</sup> C <sub>6</sub>       | 99%                        | Cambridge Isotopes | Tewksbury, MA, USA    |
| glycerol                 | <sup>13</sup> C <sub>3</sub>       | 99%                        | Sigma Isotec       | Miamisburg, OH, USA   |
| vanillin                 | ring- <sup>13</sup> C <sub>6</sub> | 99%                        | Sigma Isotec       | Miamisburg, OH, USA   |
| palmitic acid            | <sup>13</sup> C <sub>16</sub>      | 99%                        | Sigma Isotec       | Miamisburg, OH, USA   |
| algal amino acid mixture | <sup>13</sup> C                    | 98%                        | Cambridge Isotopes | Tewksbury, MA, USA    |
| lactate                  | <sup>13</sup> C <sub>3</sub>       | 99%                        | Sigma Isotec       | Miamisburg, OH, USA   |
| oxalate                  | <sup>13</sup> C <sub>2</sub>       | 99%                        | Sigma Isotec       | Miamisburg, OH, USA   |

\* Bacterial cellulose was produced by *Gluconoacetobacter xylinus* as described in Pepe-Ranney *et al.*, (2016)

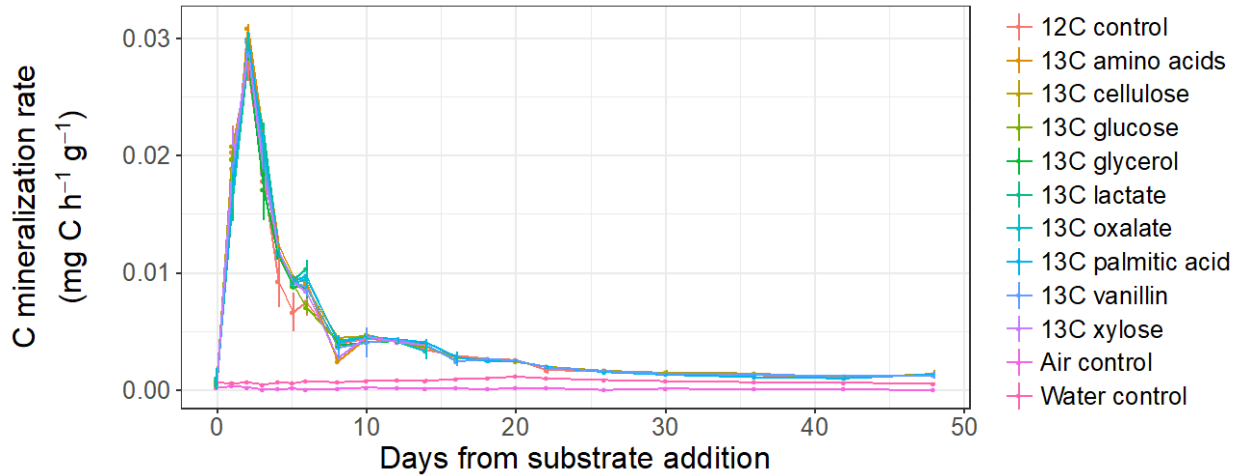

**Figure S1:** Total C (summed <sup>12</sup>C and <sup>13</sup>C) was consistent across all microcosms. This result is expected as all treatments are identical and the only variable is the identity of the <sup>13</sup>C-labeled substrate. Error bars represent ± standard deviation among microcosm replicates (*n* = 3).

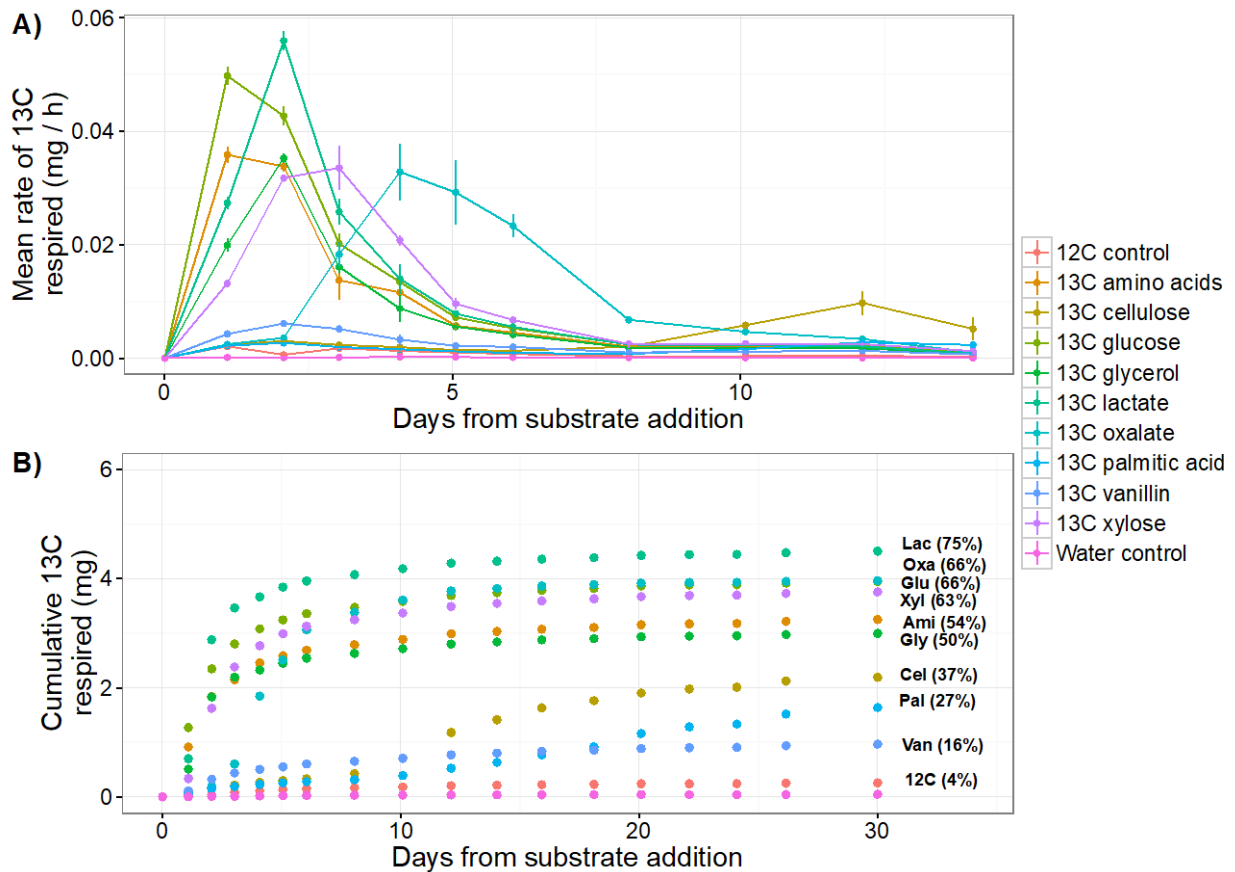

**Figure S2:** Substrate <sup>13</sup>C mineralization dynamics for pilot experiment using the same soils as the main study with A) mineralization rate and B) cumulative mineralization over time. For clarity, only days 0-14 are shown for mineralization rate. Error bars indicate ± standard deviation among microcosm replicates (*n* = 4). The dashed line in B) represents the total amount of <sup>13</sup>C added to each microcosm (6 mg) and the percentages indicate the percentage of the <sup>13</sup>C mineralized by day 30.

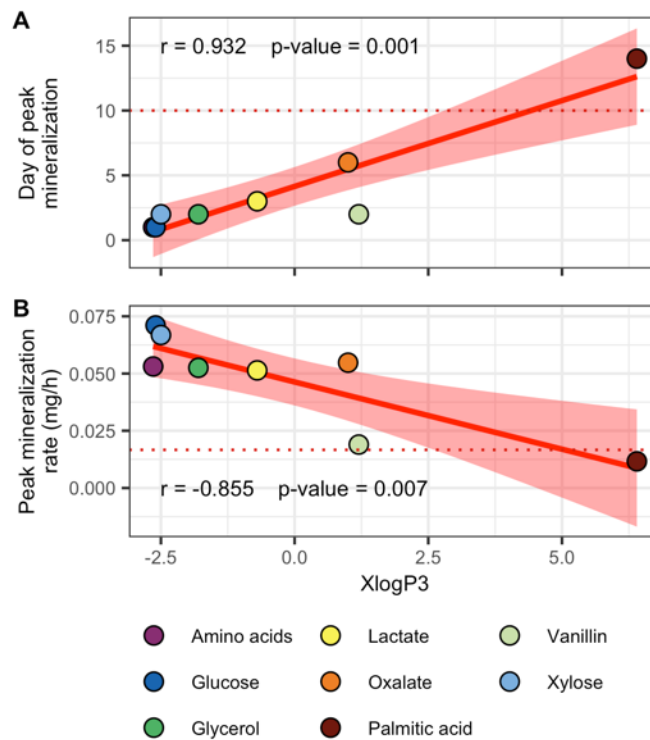

**Figure S3:** Predicted octanol-water partition coefficient (XlogP3) is significantly correlated to A) the day when maximum mineralization rate occurred and B) the maximum rate of substrate mineralization. Red lines represent linear regressions between factor and logP, with shading indicating the standard error. Pearson's correlation analysis results are displayed in each plot.



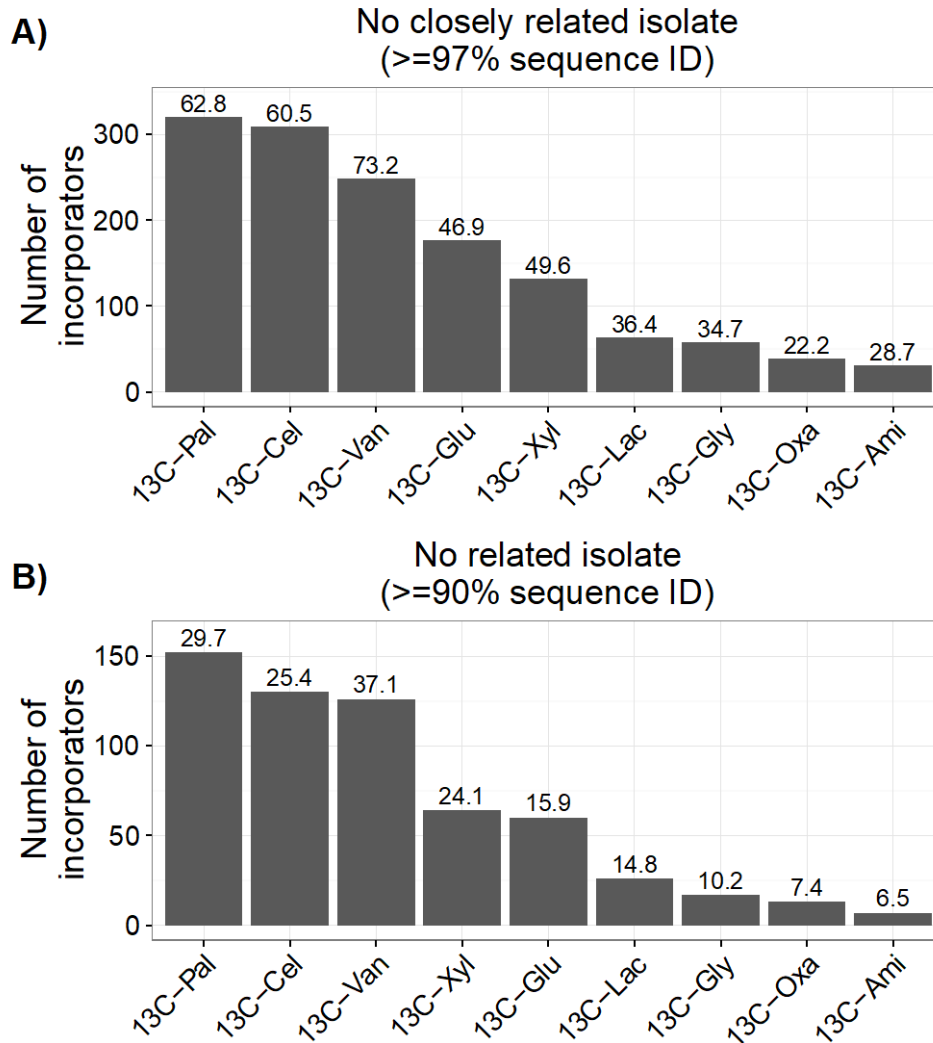

**Figure S4:** Many incorporators, particularly those assimilating C from C sources with low bioavailability, have no closely related isolates and in many cases, no related isolates. Represented here are the number of incorporators of each C source with A) no closely related isolates ( $\geq 97\%$  sequence identity) and B) with no related isolates ( $\geq 90\%$  sequence identity). Relatedness was determined from BLASTn queries of the OTU representative 16S rRNA gene sequences (V4 region) against sequences in “The All-Species Living Tree” project. Values above the bars are expressed as a percentage of the total number of incorporators for each C source.

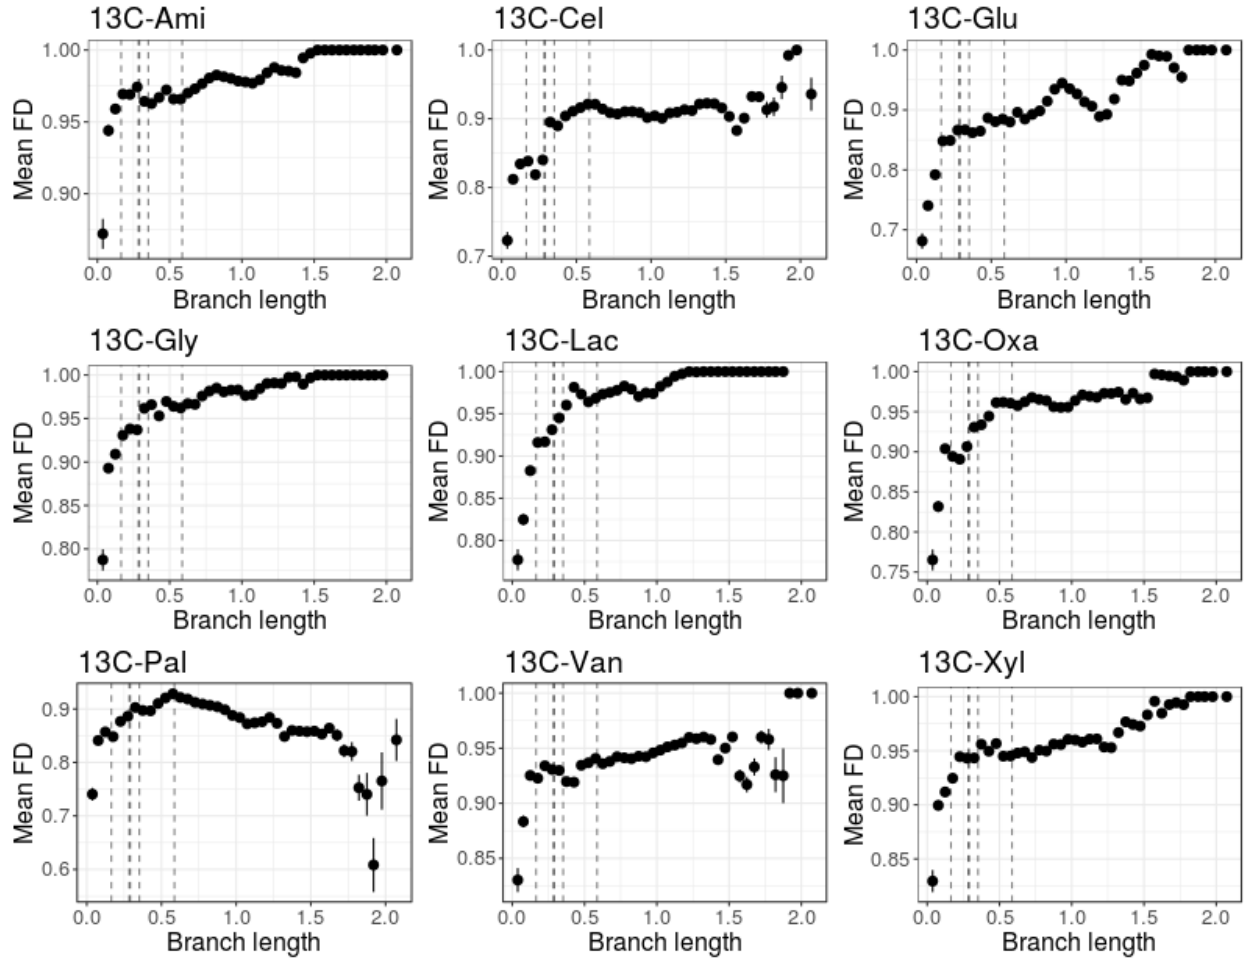

**Figure S5:** Phylogenetic distance (branch length) is a poor predictor of functional distance (mean FD) for incorporators when considering each C source independently. Branch length was derived from the 16S rRNA gene V4 region sequence phylogeny of all incorporators. Dashed lines are the median branch lengths separating OTUs across taxonomic groupings (left to right: genus, family, order, class, phylum). FD is measured as Gower's distance in C assimilation pattern.

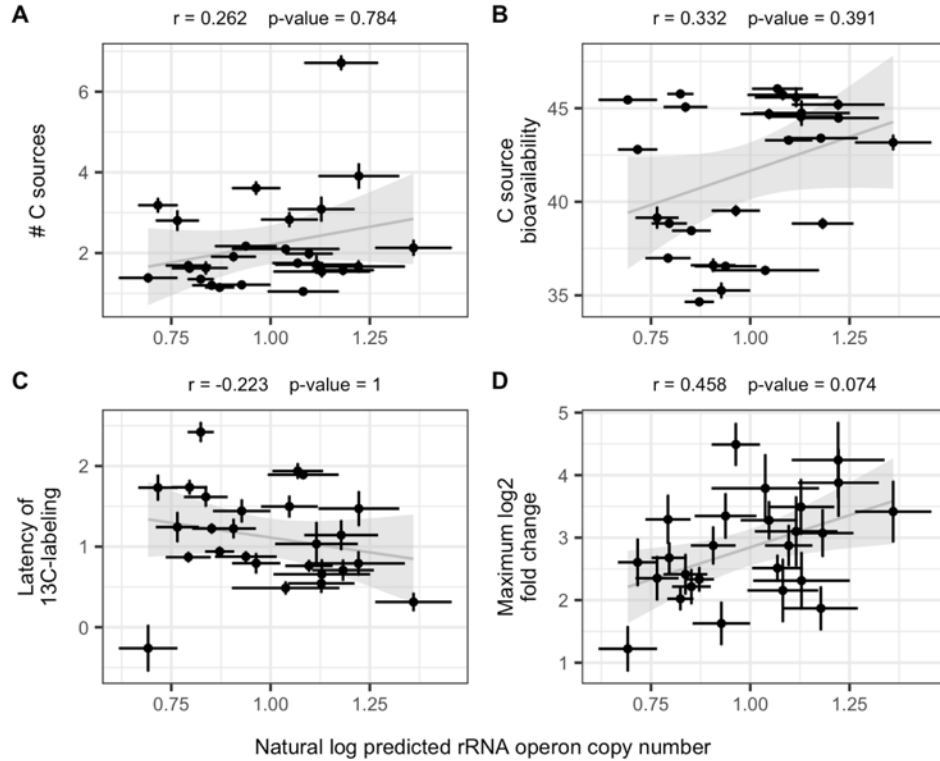

**Figure S6:** Removing the two guilds with the highest predicted rRNA operon copy number (1 and 19) causes a slight reduction in the strength of the relationship between the natural log of the predicted rRNA operon copy number and four C assimilation characteristics: A) The average number of C sources from which C was assimilated by each guild. B) The average bioavailability of the sources from which C was assimilated by each guild. C) The average latency of C assimilation for each guild. D) The dynamic growth response (max  $L_2FC$ ) of each guild as measured by increase in abundance in response to substrate addition. Red and grey lines indicate the statistically significant and non-significant linear relationship between factors respectively with shading representing standard error. Pearson's  $r$  and  $p$ -values for these relationships are listed above each plot.  $p$ -values were corrected for multiple comparisons with Benjamini-Hochberg procedure ( $n = 4$ ). Error bars for points indicate  $\pm$  standard error across OTUs within each guild.

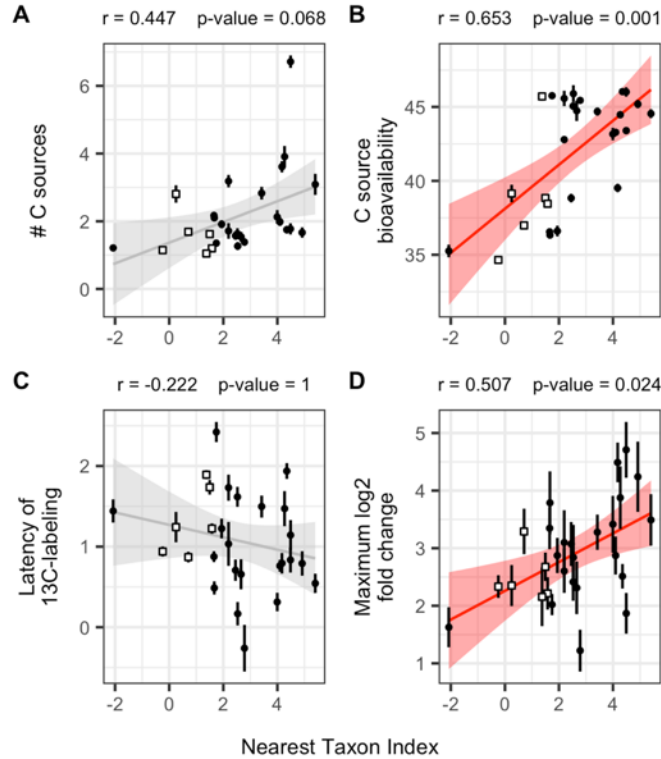

**Figure S7:** We tested whether the nearest taxon index (NTI) of guilds was correlated with C assimilation and growth characteristics. A) The average number of C sources from which C was assimilated by each guild. B) The average bioavailability of the sources from which C was assimilated by each guild. C) The average latency of C assimilation for each guild. D) The dynamic growth response (max L<sub>2</sub>FC) of each guild as measured by increase in abundance in response to substrate addition. Red and grey lines indicate the statistically significant and non-significant linear relationship between factors respectively with shading representing standard error. Pearson's r and p-values for these relationships are listed above each plot. p-values were corrected for multiple comparisons with Benjamini-Hochberg procedure ( $n = 4$ ). Error bars for points indicate  $\pm$  standard error across OTUs within each guild.

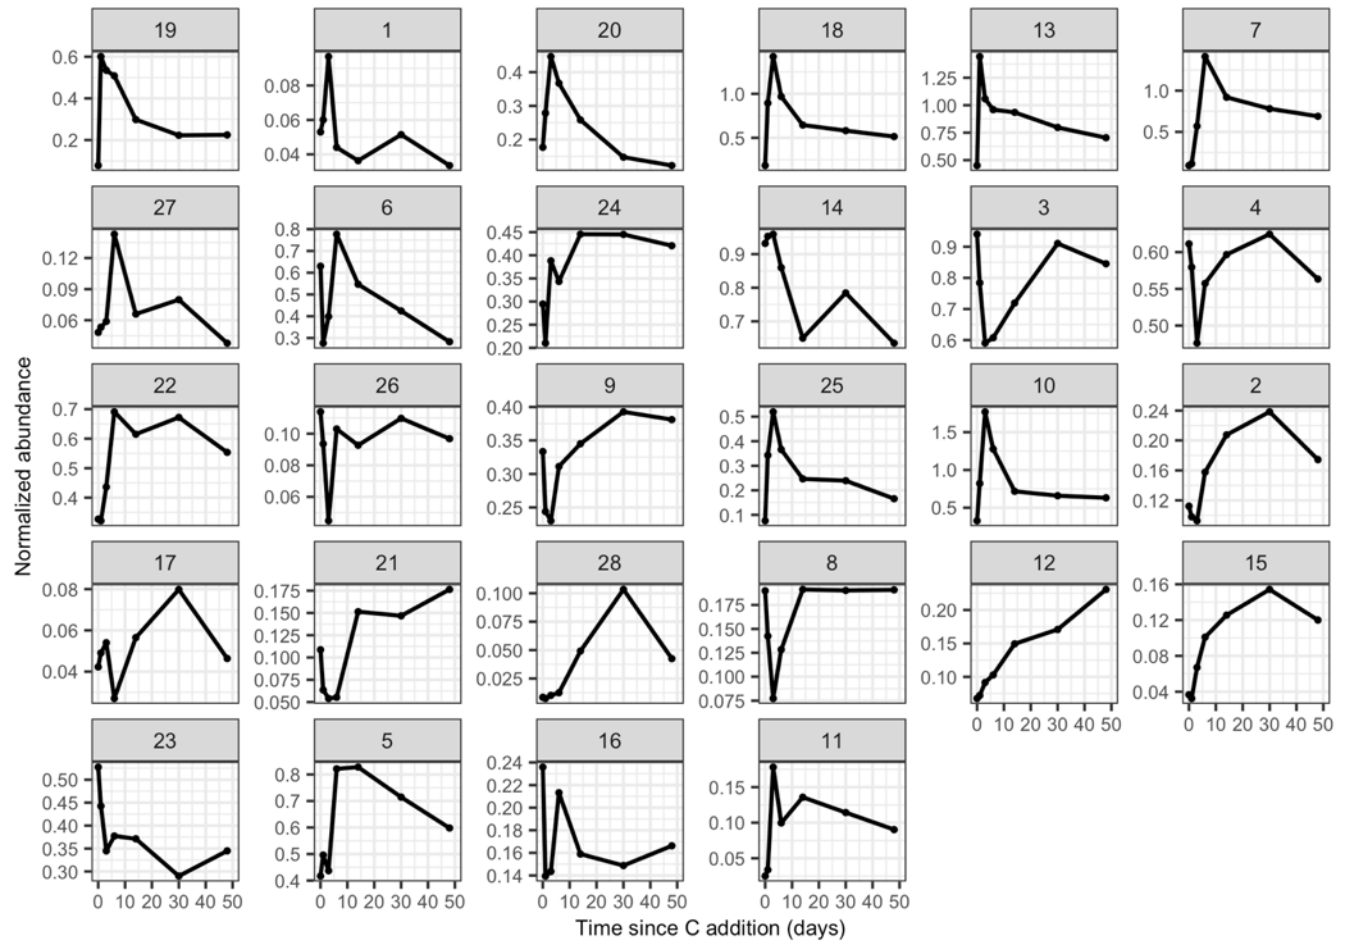

**Figure S8:** Normalized abundance of each guild over time throughout the experiment. Normalized abundance (expressed as  $\mu\text{g}$  of DNA) is calculated from relative abundance values normalized by *rnm* copy number and DNA yield. Abundances are summed across all OTUs within each guild. Guilds are indicated by the number at the top of the plots and ordered based on positions in the PCA.

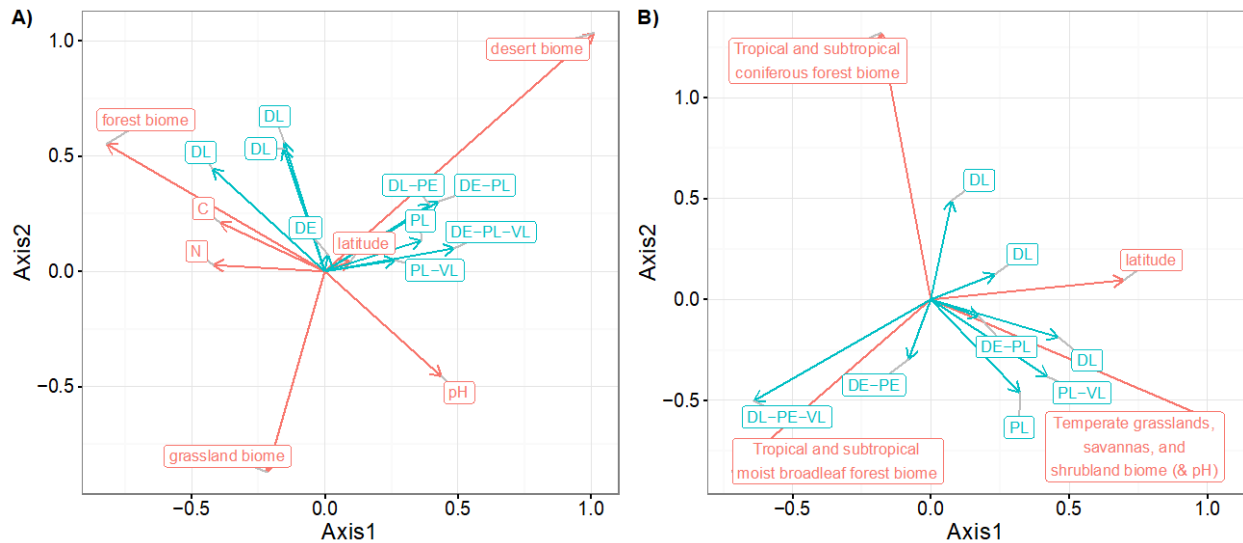

**Figure S9:** Results from RLQ analysis of incorporators mapped to bacterial surveys at the A) continental scale (QIITA study 619) and B) global scale (QIITA study 928). Incorporator functional clusters were further grouped by form of the substrate from which C was assimilated (D = dissolved, including glucose, xylose, amino acids, glycerol, lactate, and oxalate; V = vanillin; P = particulate, including cellulose and palmitic acid) and by time of C assimilation (E = early, L = late) as indicated by the blue letters.

## Supplementary References

1. S. T. Berthrong, D. H. Buckley, L. E. Drinkwater, Agricultural management and labile carbon additions affect soil microbial community structure and interact with carbon and nitrogen cycling. *Microb. Ecol.* **66**, 158–170 (2013).
2. C. Pepe-Rannek, A. N. Campbell, C. N. Koechli, S. Berthrong, D. H. Buckley, Unearthing the ecology of soil microorganisms using a high resolution DNA-SIP approach to explore cellulose and xylose metabolism in soil. *Front. Microbiol.* **7**, 03 (2016).
3. T. Cheng, *et al.*, Computation of octanol–water partition coefficients by guiding an additive model with knowledge. *J. Chem. Inf. Model.* **47**, 2140–2148 (2007).
4. R. I. Griffiths, A. S. Whiteley, A. G. O’Donnell, M. J. Bailey, Rapid method for coextraction of DNA and RNA from natural environments for analysis of ribosomal DNA- and rRNA-based microbial community composition. *Appl. Environ. Microbiol.* **66**, 5488–5491 (2000).
5. N. D. Youngblut, D. H. Buckley, Intra-genomic variation in G + C content and its implications for DNA stable isotope probing. *Environ. Microbiol. Rep.* **6**, 767–775 (2014).
6. S. E. Barnett, N. D. Youngblut, D. H. Buckley, Soil characteristics and land-use drive bacterial community assembly patterns. *FEMS Microbiol. Ecol.* **96**, fiz194 (2019).
7. J. J. Kozich, S. L. Westcott, N. T. Baxter, S. K. Highlander, P. D. Schloss, Development of a dual-index sequencing strategy and curation pipeline for analyzing amplicon

- sequence data on the MiSeq Illumina sequencing platform. *Appl. Environ. Microbiol.* **79**, 5112–5120 (2013).
8. J. Zhang, K. Kobert, T. Flouri, A. Stamatakis, PEAR: a fast and accurate Illumina Paired-End reAd mergeR. *Bioinformatics* **30**, 614–620 (2014).
  9. P. D. Schloss, *et al.*, Introducing mothur: open-source, platform-independent, community-supported software for describing and comparing microbial communities. *Appl. Environ. Microbiol.* **75**, 7537–7541 (2009).
  10. R. C. Edgar, Search and clustering orders of magnitude faster than BLAST. *Bioinformatics* **26**, 2460–2461 (2010).
  11. J. G. Caporaso, *et al.*, QIIME allows analysis of high-throughput community sequencing data. *Nat. Methods* **7**, 335–336 (2010).
  12. S. Dray, P. Choler, S. Dolédec, P. R. Peres-Neto, W. Thuiller, S. Pavoine, C. J. F. ter Braak, Combining the fourth-corner and the RLQ methods for assessing trait responses to environmental variation. *Ecology* **95**, 14–21 (2014).
  13. S. Dray, D. Chessel, J. Thioulouse, Co-inertia analysis and the linking of ecological data tables. *Ecology* **84**, 3078–3089 (2003).
  14. S. Dray, A. B. Dufour, The ade4 package: implimenting the duality diagram for ecologists. *J. Stat. Softw.* **22**, 1–20 (2007).
